# Supplementary material for: Trends in the nephrologist workforce in South Africa (2002–2017) and forecasting for 2030
Source: PLoS One. 2021 Aug 12;16(8):e0255903. doi: 10.1371/journal.pone.0255903 (PMC8360377; doi:10.1371/journal.pone.0255903)
Supplement: S1 File — (XLS) [file pone.0255903.s001.xls]

## Sheet: Sheet1
	Certificate Examination passes	HPCSA new nephrologist registrations
2002	6	1
2003	2	5
2004	4	3
2005	7	3
2006	1	4
2007	7	4
2008	5	4
2009	2	2
2010	5	5
2011	6	6
2012	9	8
2013	8	9
2014	7	6
2015	8	9
2016	5	6
2017	4	7
